# Supplementary material for: An unprecedented anionic Ln-MOF with a cage-within-cage motif: spontaneous reduction and immobilization of ion-exchanged Pd(ii) to Pd-NPs in the framework
Source: Royal Society of Chemistry journal article supplement (doi:10.1039/c5ta04937g), 2015-01-01
Supplement: c5ta04937g1.pdf [file c5ta04937g1.pdf]

## An unprecedented anionic Ln-MOF with cage-within-cage motif: spontaneous reduction and immobilization of ion-exchanged Pd(II) to Pd-NPs in the framework

Yun-Hu Han,<sup>a, b</sup> Chong-Bin Tian,<sup>a</sup> Ping Lin<sup>a</sup> and Shao-Wu Du<sup>\*a</sup>

<sup>a</sup> State Key Laboratory of Structural Chemistry, Fujian Institute of Research on the Structure of Matter, Chinese

<sup>b</sup> University of Chinese Academy of Sciences, Beijing 100039, P. R. China.

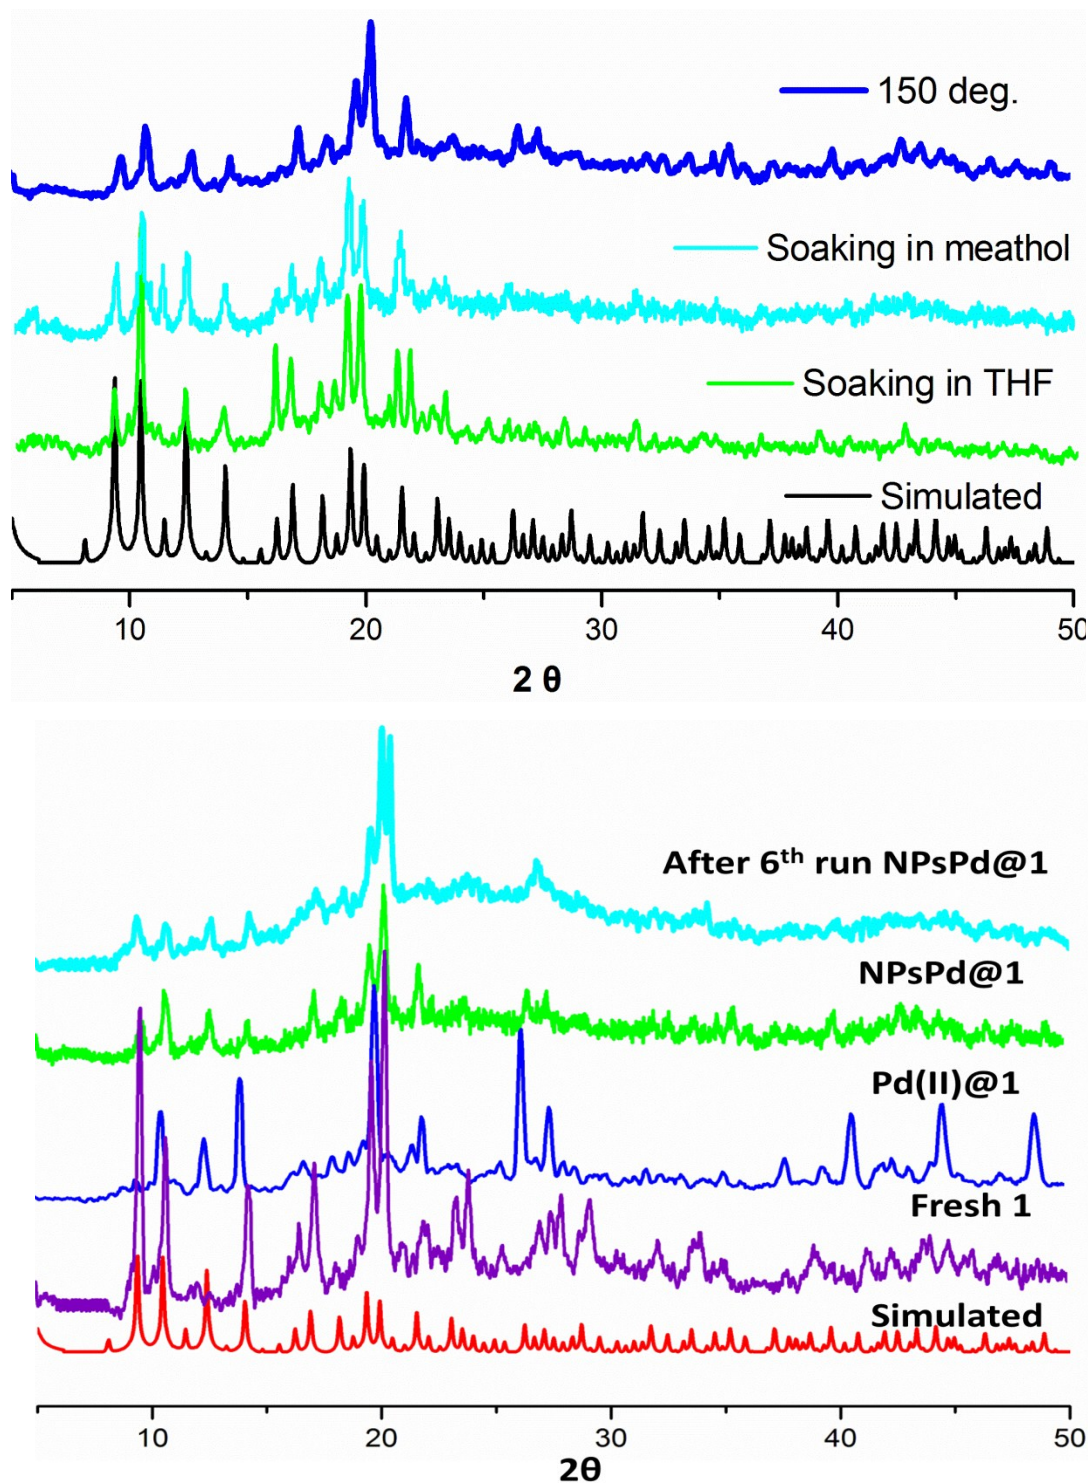

**Fig. S1** The PXRD curves of **1** and the Pd<sup>2+</sup>/Pd-NPs inclusion compounds.

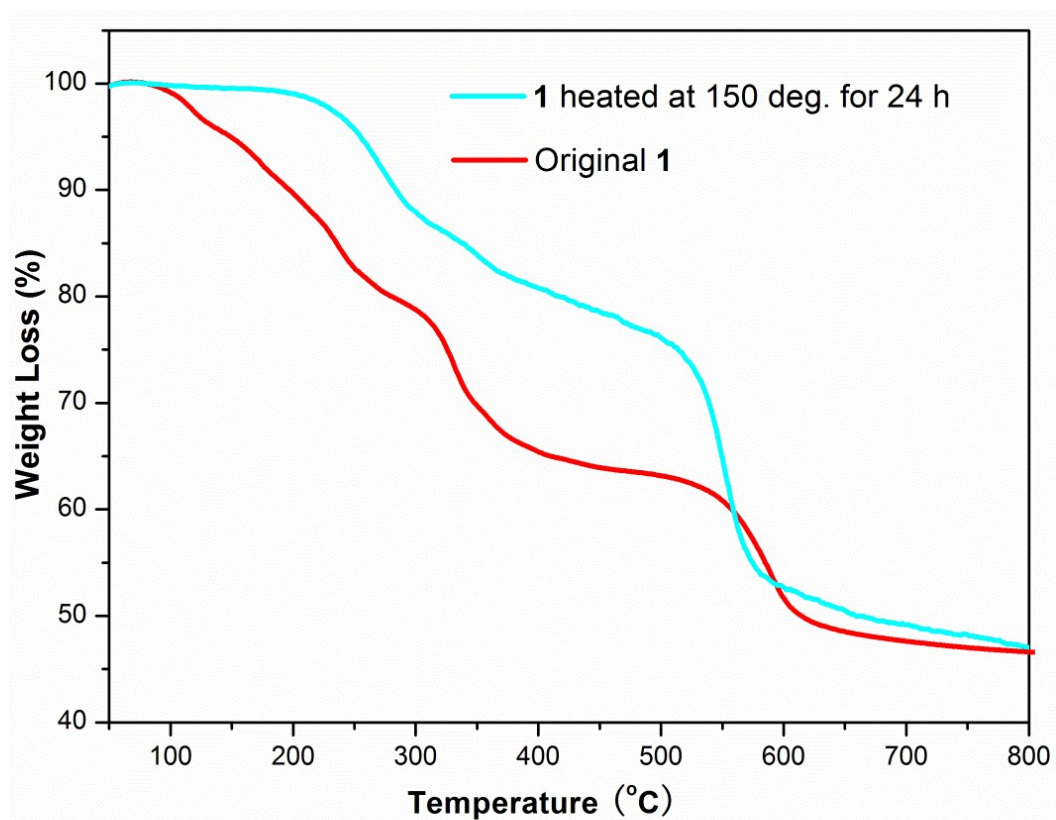

**Fig. S2** TGA curves of **1** and the desolvated sample by heating **1** at 150°C for 24 h.

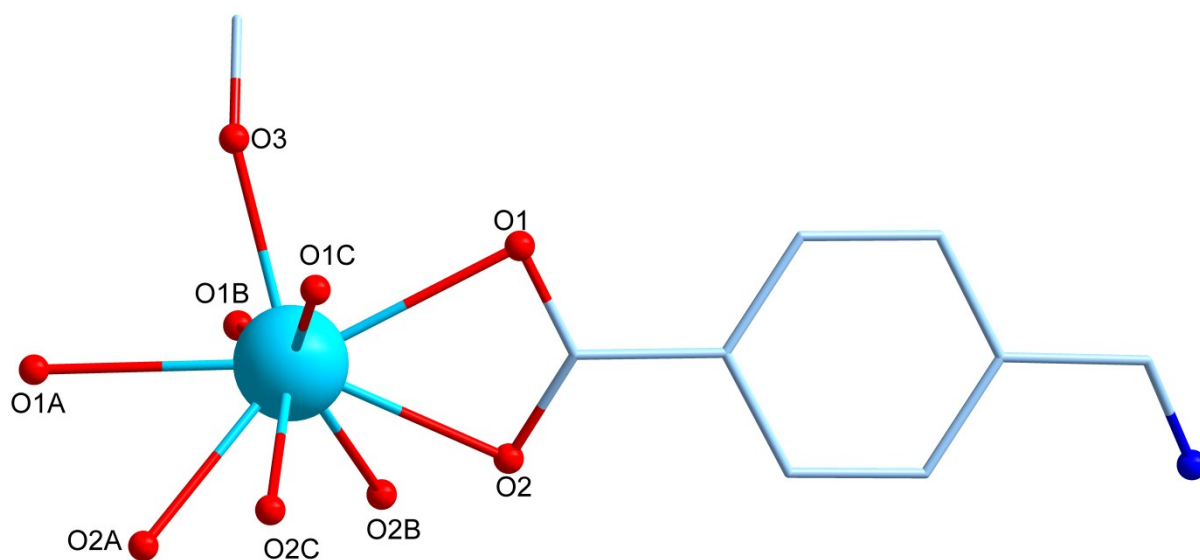

**Fig. S3** The coordination environment of Tb<sup>3+</sup> in **1**. Symmetry code: (A)  $-x, -y+1, z$ ; (B)  $x, -y+1, z$ ; (C)  $-x, y, z$ ; (D)  $y, z, x$ .

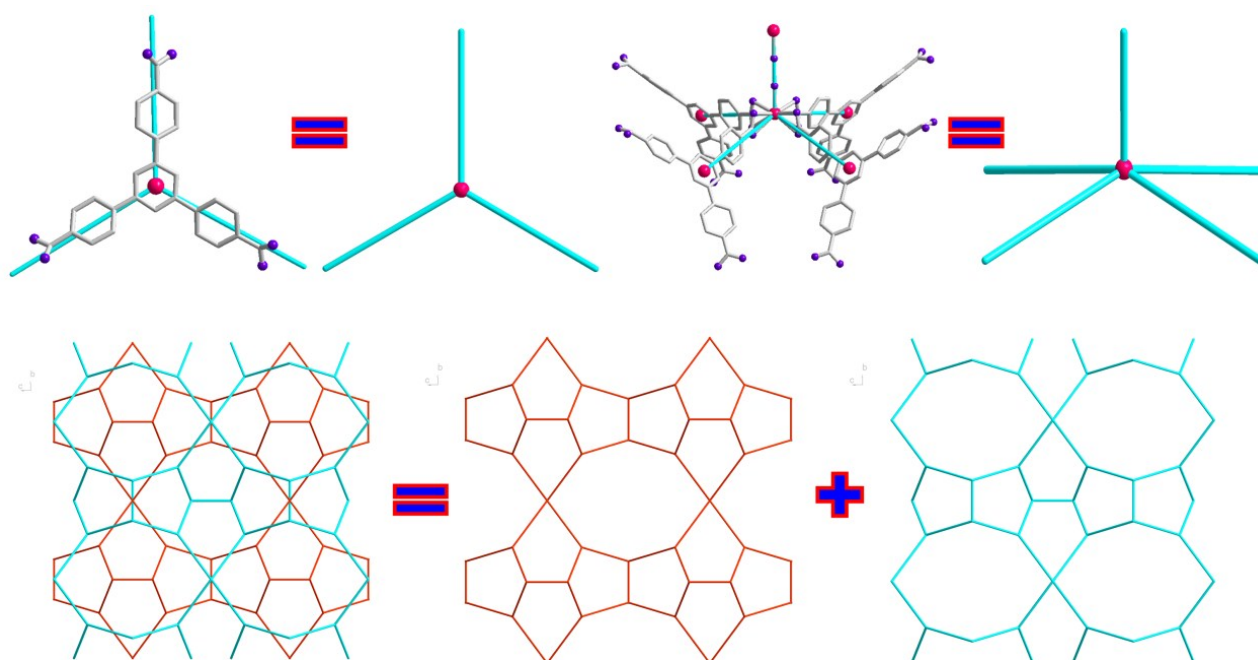

**Fig. S4** The network topology of **1**.

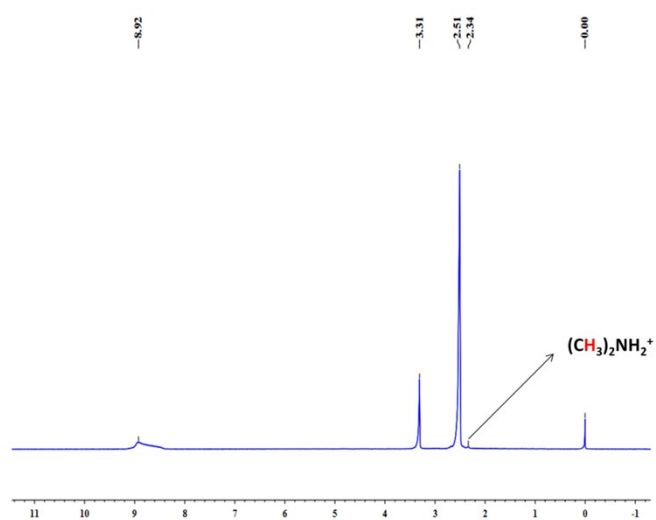

(a)

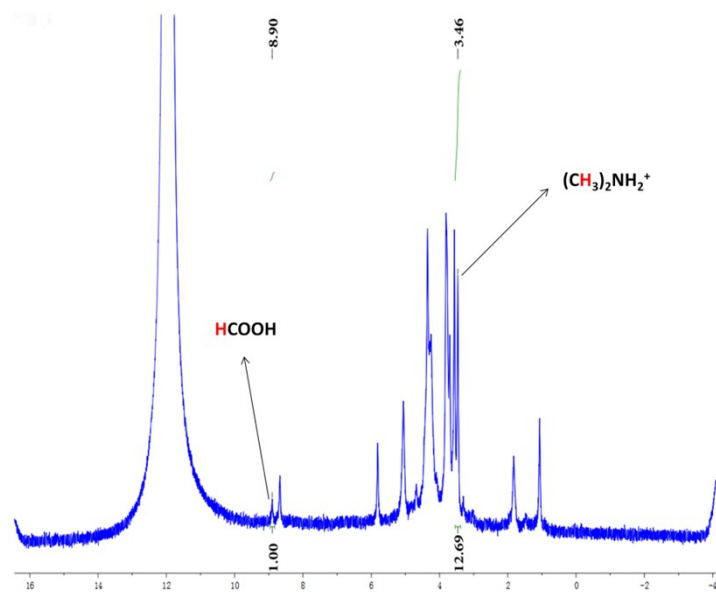

(b)

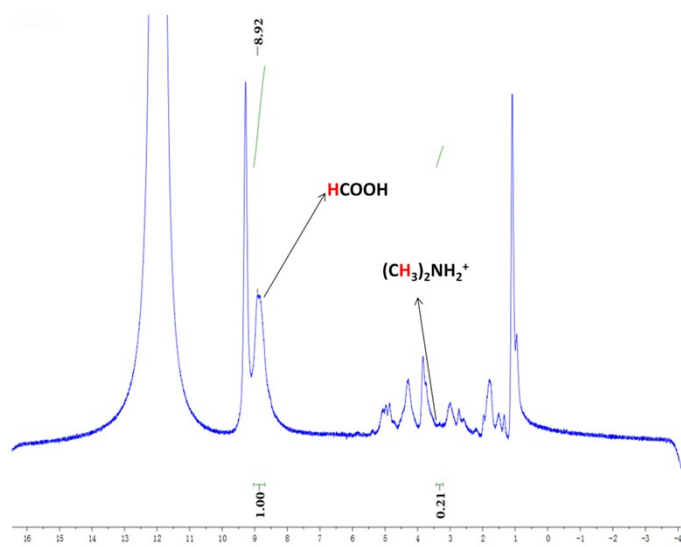

(c)



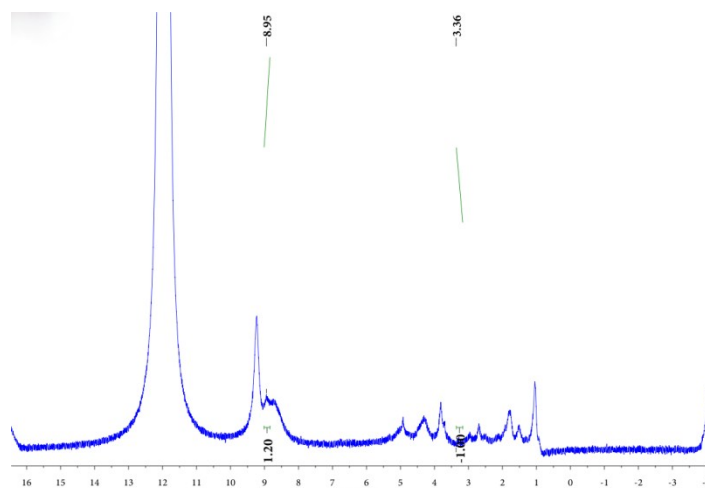

(d)

**Fig. S5** (a)  $^1\text{H}$  NMR spectrum of **1a** after immersed in DMSO- $d_6$  containing  $\text{Pd}^{2+}$ , (b)  $^1\text{H}$  NMR spectrum of acid-digested sample **1a**, (c)  $^1\text{H}$  NMR spectrum of acid-digested sample **1c**, (d)  $^1\text{H}$  NMR spectrum of acid-digested sample **Pd-NPs@1c**.

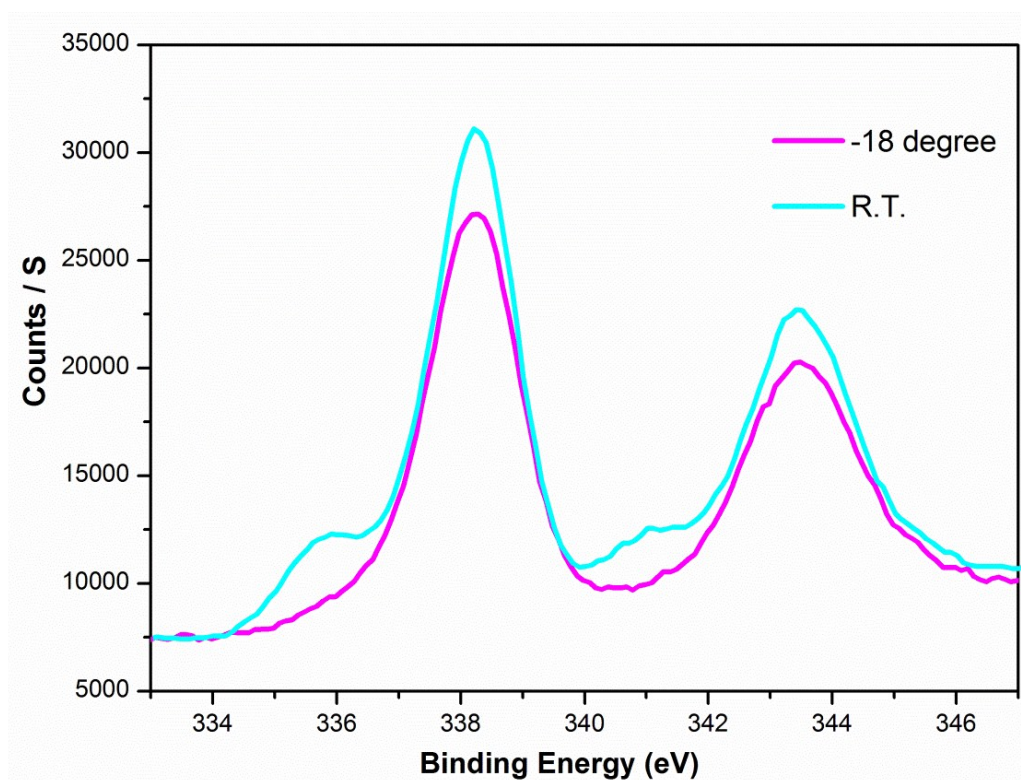

**Fig. S6** X-ray photoelectron spectra of the  $\text{Pd}^{2+}$  embedded samples prepared at  $-18^\circ\text{C}$  (Pink) and at room temperature for one day in THF (Turquoise).

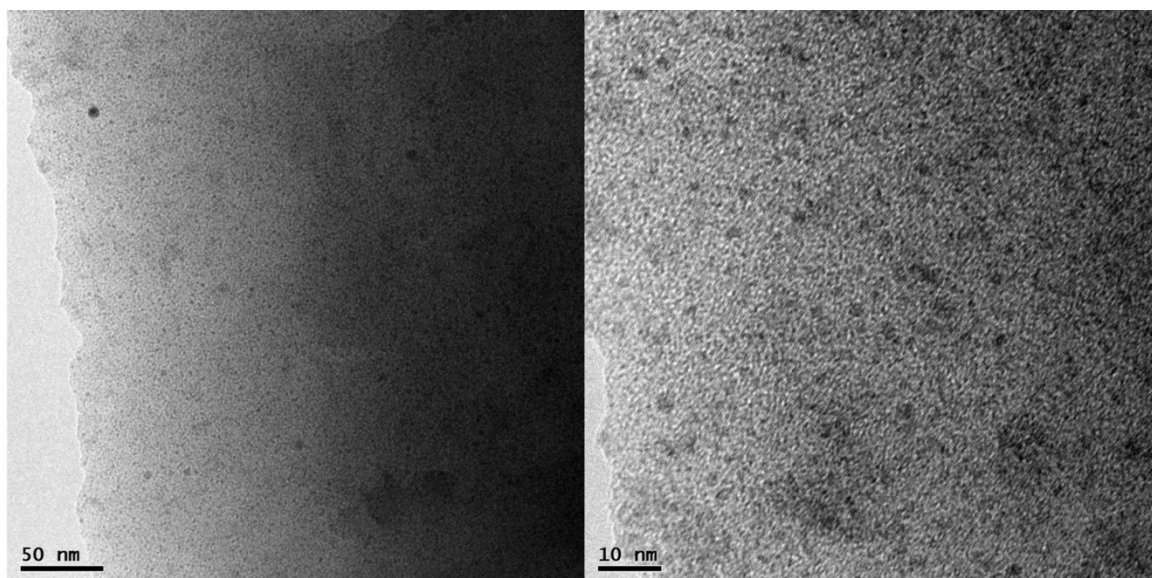

**Fig. S7** TEM images of **Pd-NPs@1** via self-redox of **1b** in vacuum at room temperature for four weeks.

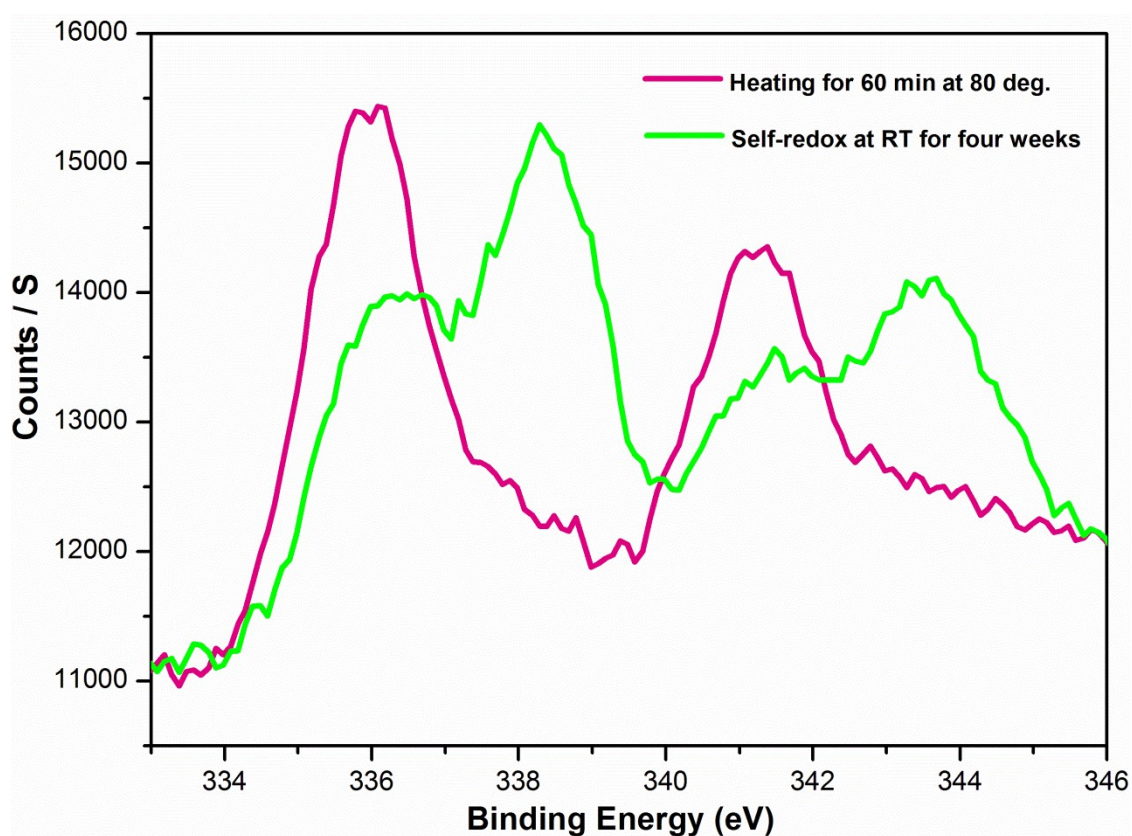

**Fig. S8** X-ray photoelectron spectra of **Pd-NPs@1** prepared by heating **1b** for 1 h at 80°C in vacuum and that through self-redox of **1b** under vacuum at room temperature for four weeks.

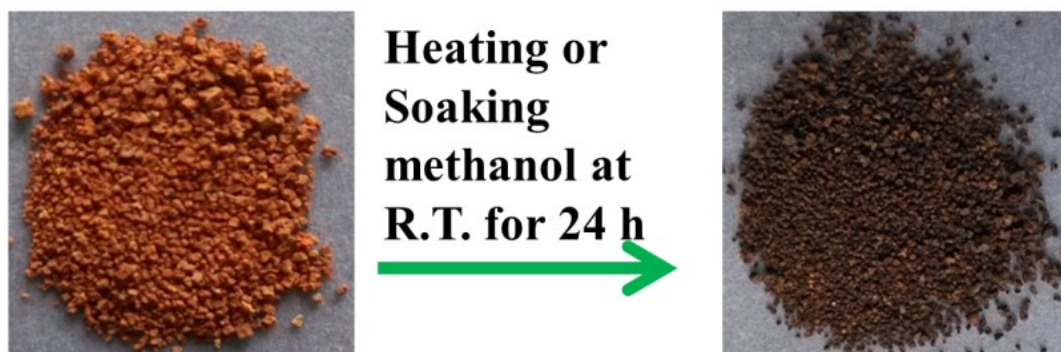

**Fig. S9** The colour change from orange to black-brown with heating or soaking methanol at R.T. for 24 h.

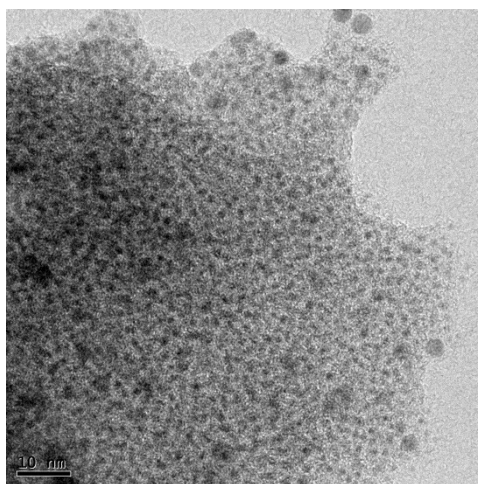

**Fig. S10** TEM image of Pd-NPs@1c



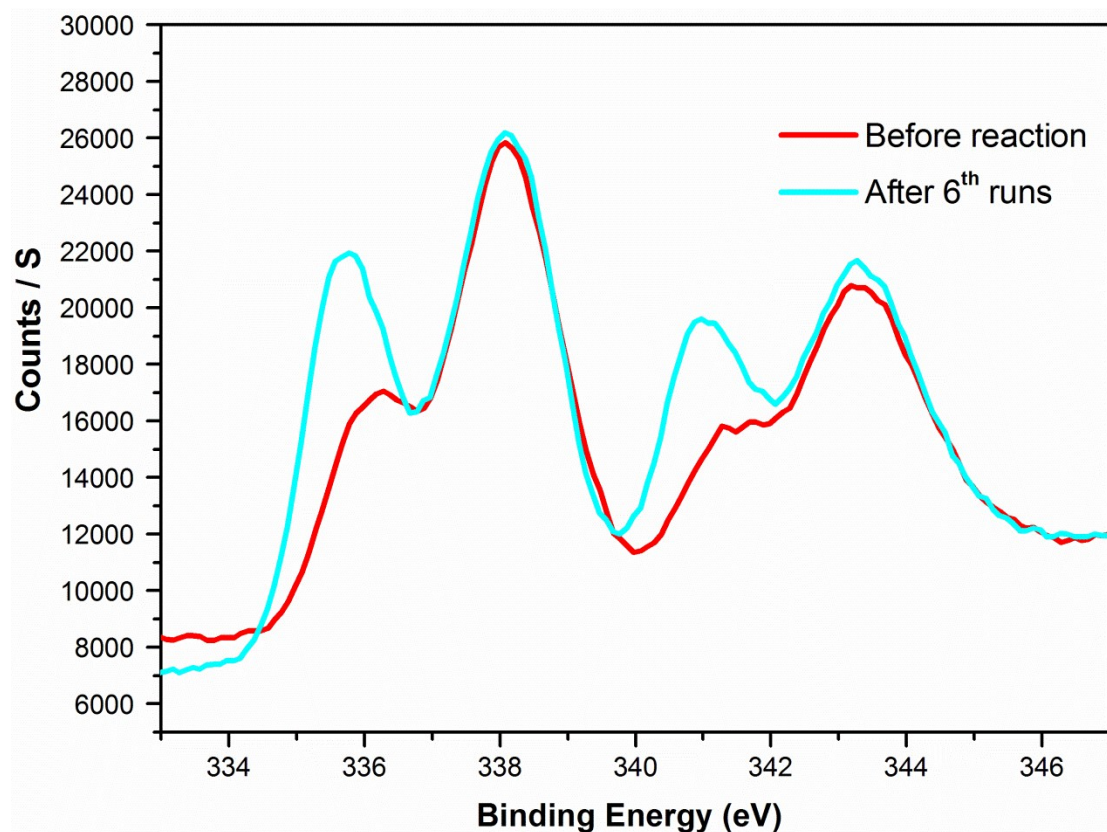

**Fig. S11** X-ray photoelectron spectra of NPsPd@1' and NPsPd@1' after the 6<sup>th</sup> catalytic run.

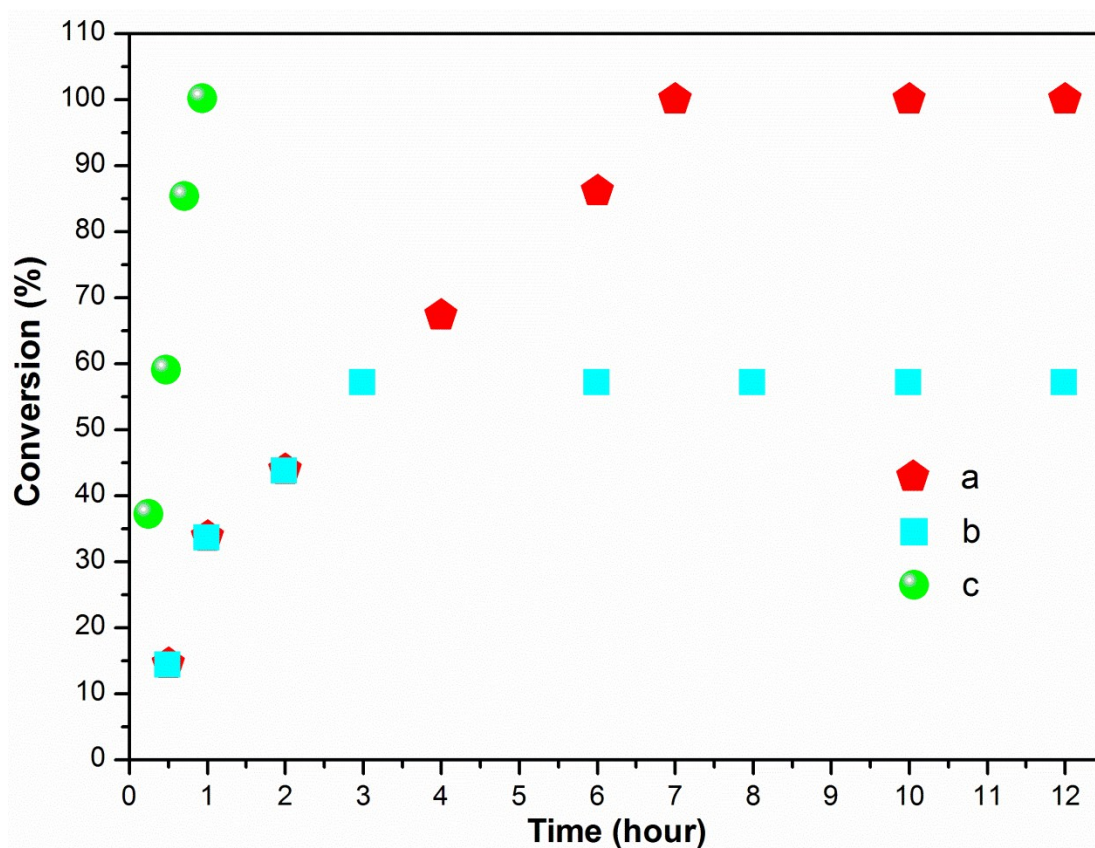

**Fig. S12** (a) Time profile of the conversion of styrene to ethylbenzene catalyzed by Pd-NPs@1 at room temperature; (b) After the reaction was performed for 3 hours, Pd-NPs@1 was removed from the solution and the reaction was continued for another 9 hours; (c) Time profile of the conversion of styrene to ethylbenzene catalyzed by Pd-NPs@1 at 60°C.



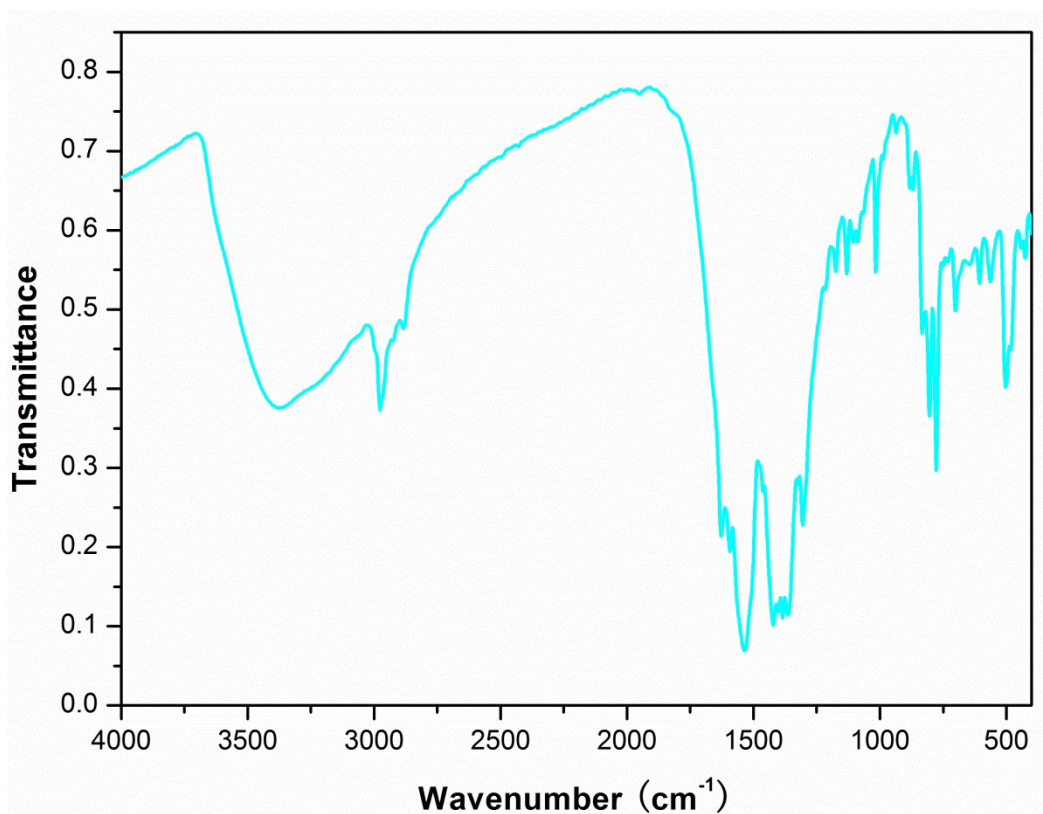

**Fig. S13** The IR spectrum of **1**.

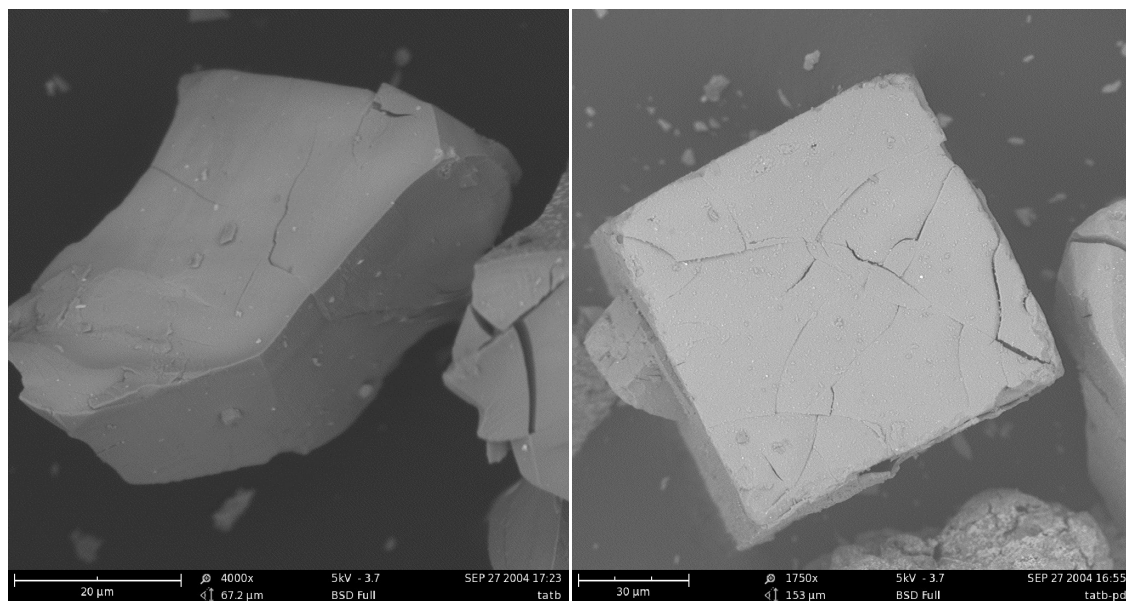

**Fig. S14** The SEM images of fresh **1** (left) and Pd-NPs@**1** (right).

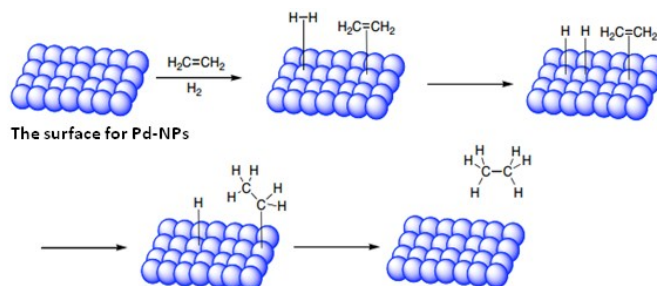

**Scheme S1** The proposed mechanism for the hydrogenation of an alkene catalysed by Pd-NPs

**Table S1** Crystallographic data and structure refinement details for **1**

| Compound                                       | <b>1</b>                                                                            |
|------------------------------------------------|-------------------------------------------------------------------------------------|
| Formula                                        | C <sub>480</sub> H <sub>576</sub> N <sub>72</sub> O <sub>180</sub> Tb <sub>12</sub> |
| Fw                                             | 12141.31                                                                            |
| Cryst. Syst.                                   | Cubic                                                                               |
| space group                                    | <i>Im-3</i>                                                                         |
| <i>a</i> , Å                                   | 26.7264(13)                                                                         |
| <i>α</i> , °                                   | 90.00                                                                               |
| <i>V</i> , Å <sup>3</sup>                      | 19090.7(16)                                                                         |
| <i>Z</i>                                       | 2                                                                                   |
| <i>μ</i> , mm <sup>-1</sup>                    | 1.163                                                                               |
| <i>D</i> <sub>calcd</sub> , g cm <sup>-3</sup> | 1.056                                                                               |
| GOF                                            | 1.196                                                                               |
| <sup>a</sup> <i>R</i> <sub>1</sub>             | 0.0628                                                                              |
| <i>wR</i> <sub>2</sub>                         | 0.1521                                                                              |

$$^a R_1 = \Sigma ||F_o| - |F_c|| / \Sigma |F_o|, wR_2 = [\Sigma w(F_o^2 - F_c^2)^2 / \Sigma w(F_o^2)^2]^{1/2}$$
